# Supplementary material for: A gold nanoparticles growth-based immunoassay for detection of antibiotic residues
Source: Royal Society of Chemistry journal article supplement (doi:10.1039/c6ay02977a), 2016-12-09
Supplement: c6ay02977a1.pdf [file c6ay02977a1.pdf]

Supporting Information for

## **A Gold Nanoparticles Growth-based Immunoassay for Detection of Antibiotic Residues**

Wenbo Yu, <sup>\*a</sup> Maria Knauer, <sup>a</sup> Christoph Kunas, <sup>a</sup> Ulas Acaroz, <sup>a, b</sup> Richard Dietrich, <sup>a</sup>  
and Erwin Märtlbauer <sup>a</sup>

<sup>a</sup> Department of Veterinary Sciences, Faculty of Veterinary Medicine, Ludwig-Maximilians-Universität München, Schönleutnerstr. 8, 85764 Oberschleißheim, Germany

<sup>b</sup> Present address: Food Hygiene and Technology Department, Faculty of Veterinary Medicine, Afyon Kocatepe University, Afyonkarahisar, Turkey

### **Corresponding Author**

E-mail: Wenbo.Yu@mh.vetmed.uni-muenchen.de

## EXPERIMENTAL SECTION

**Materials and chemicals.** Gold (III) chloride hydrate, cloxacillin, D-glucose, sodium borohydride, trisodium citrate dehydrate, glucose oxidase (GlcOx), and casein sodium salt were purchased from Sigma-Aldrich GmbH (Steinheim, Germany). Goat anti-mouse IgG labeled with GlcOx was purchased from Abcam (Cambridge, UK). GlcOx-cloxacillin conjugates and monoclonal antibodies against cloxacillin (mAb 1F7) were produced in our laboratory as described.<sup>1,2</sup> All the other reagents required for the experiments were of analytical grade and used as received.

**Gold seed solution.** Gold seed solution was produced using the previously published method.<sup>3</sup> Briefly, 23.0  $\mu\text{mol}$  gold (III) chloride hydrate and 26.4  $\mu\text{mol}$  trisodium citrate dehydrate were dissolved in 100 mL deionized water. Then, 20 mL of the mixture were transferred into a sterile centrifugation tube, 600  $\mu\text{L}$  freshly made 0.01 M  $\text{NaBH}_4$  were added and the tube was inverted 3 times. To allow the borohydride to react completely, the reaction mixture was left at room temperature for 4 hours and stored at 4 °C until use. The final concentration was 15 nM and the nanoparticles had a diameter of 7 nm.

**Identification of GlcOx-mediated sensing.** GlcOx was serially diluted with deionized water to reach a final concentration ranging from 200 to 0  $\text{mU mL}^{-1}$  in cuvettes. Then, 200  $\mu\text{L}$  glucose (10 mM in  $\text{H}_2\text{O}$ ) were mixed with the GlcOx solutions at a 2:1 volume ratio and the mixtures were incubated at 37 °C for 1h. Subsequently, 150  $\mu\text{L}$   $\text{HAuCl}_4$  (1.25 mM in  $\text{H}_2\text{O}$ ) and 150  $\mu\text{L}$  gold seed solution were added into each cuvette. This solution was incubated at ambient temperature for another 40 min for the AuNPs growth reaction. The photographs were taken by a digital camera (D7000, Nikon, Japan) on a light table (SlimLine S, Rex, Germany). The spectrum from 400 to 800 nm of the AuNPs solutions was recorded by UV-Vis spectroscopy (Specord 200 Plus, Analytik Jena, Germany).

**Sample preparation.** Bovine muscle samples obtained from local retail shops were used to demonstrate the applicability of the approach for cloxacillin determination. Exactly 2.00 g of

bovine muscle samples were homogenized in 10 mL PBS by using BMT-20-S tubes containing stainless steel balls and an Ultra-Turrax Tube driver (Ika, Germany) at 6000 rpm for 10 s. The homogenates were spiked with cloxacillin at concentrations of 150, 300, and 600 ng mL<sup>-1</sup>. After that, the spiked homogenates were mixed for another 30 s at 6000 rpm, filtered by medium fast filter paper (Grade 597, Whatmann, UK), and directly analyzed by immunoassay without any further clean-up.

**Plasmonic ELISA for food samples.** For the determination of cloxacillin in bovine muscle, microtiter plates were coated with GlcOx-cloxacillin (2 µg mL<sup>-1</sup> in PBS; 100 µL per well) at room temperature overnight. After washing for 3 times with wash solution (0.85% NaCl containing 0.025% Tween-20 in H<sub>2</sub>O), the microtiter plate was blocked with 3% casein in PBS for 30 min. Subsequently, various concentrations of cloxacillin (diluted in PBS) or samples (50 µL) were added together with 50 µL mAb 1F7 (0.5 µg mL<sup>-1</sup> in PBS) and incubated for 1 h. Not adsorbed antibody and antigen were then removed by washing 4 times with wash solution. Then, GlcOx labeled goat anti-mouse IgG from Abcam was employed as secondary antibody (1:125 diluted in PBS; 100 µL per well) and incubated for 1 h at room temperature. Subsequently, the plate was carefully washed 4 times with wash solution and another 4 times with deionized water. Then, 100 µL glucose (10 mM in H<sub>2</sub>O) were added into each well and incubated at 37 °C for 1 h. For the colorimetric detection, 50 µL gold seed solution and 50 µL H<sub>2</sub>AuCl<sub>4</sub> (1.25 mM in H<sub>2</sub>O) were added into each well and kept to react at ambient temperature for 40 min. Quantitative measurements were obtained with a high-throughput ELISA Reader (Sunrise RC, Tecan, Germany). The calibration curve was analyzed with a four-parameter logistic equation using Prism 5 (GraphPad Software, La Jolla, USA).

## SUPPLEMENTARY FIGURE AND TABLE

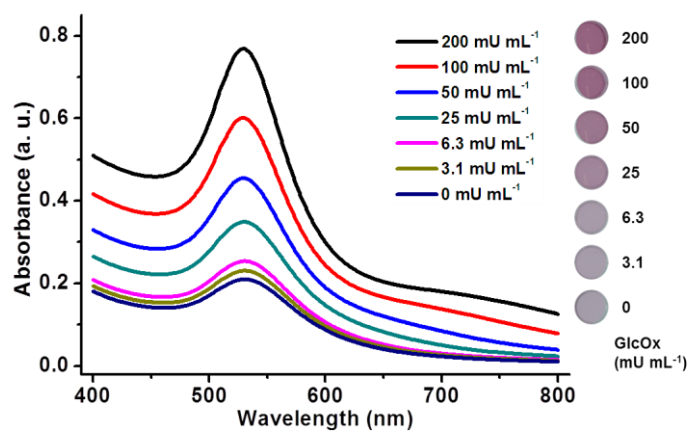

**Figure S1** UV-vis spectra of AuNPs growth-based colorimetric nanosensor using varying GlcOx concentrations (0 – 200 mU mL<sup>-1</sup>). Measurements were performed after incubating the enzyme in the presence of AuNPs and HAuCl<sub>4</sub> for 40 min. Photograph of different solutions was taken at 40 min.

**Table S1** Comparison between the developed GlcOx/AuNPs/HAuCl<sub>4</sub>-based signal generation mechanism to the most commonly used HRP/TMB-based mechanism

|                  |                                     | <b>HRP/TMB-based mechanism</b> | <b>GlcOx/AuNPs/HAuCl<sub>4</sub>-based mechanism</b> |
|------------------|-------------------------------------|--------------------------------|------------------------------------------------------|
|                  | Protein                             | Horseradish peroxidase         | Glucose oxidase                                      |
| <b>Enzyme</b>    | Price                               | 175 Euro per 10 KU             | 47.8 Euro per 10 KU                                  |
|                  | Secondary antibody conjugate        | Commercial available           | Commercial available                                 |
|                  | Chemicals                           | 3,3',5,5'-tetramethylbenzidine | AuNPs and H <sub>2</sub> AuCl <sub>4</sub>           |
| <b>Substrate</b> | Price for 100 mL substrate solution | 1.08 Euro                      | 0.69 Euro                                            |
|                  | Stability                           | Need stop solution             | Stable signal                                        |
|                  | Toxicity                            | Potentially toxic              | Not toxic                                            |

**Table S2** Comparison of the performances of various immunoassay variants for cloxacillin detection

| Platform             | Signal readout                                | Antibody            | LOD (ng mL <sup>-1</sup> ) | Sample        | Ref.      |
|----------------------|-----------------------------------------------|---------------------|----------------------------|---------------|-----------|
| Biosensor BIAcoreTM  | Optical Response Units                        | Polyclonal Antibody | 60                         | PBS           | 4         |
| Automated microarray | Chemiluminescence                             | Monoclonal antibody | 0.29                       | Milk          | 5         |
| ELISA Plate          | Colorimetric (3,3',5,5'-tetramethylbenzidine) | Monoclonal antibody | 6.3                        | Milk          | 6         |
| ELISA Plate          | Colorimetric (3,3',5,5'-tetramethylbenzidine) | Polyclonal antibody | 4                          | Milk          | 7         |
| ELISA Plate          | Colorimetric (AuNPs)                          | Monoclonal antibody | 3.4                        | Bovine muscle | This work |

**Table S3** Recovery of cloxacillin from artificially contaminated bovine muscle samples at different concentration levels (n = 5)

| <b>Added</b><br>(ng mL <sup>-1</sup> ) | <b>Found</b>                          |                                                  |                        |                              |
|----------------------------------------|---------------------------------------|--------------------------------------------------|------------------------|------------------------------|
|                                        | <b>Mean</b><br>(ng mL <sup>-1</sup> ) | <b>±SD<sup>a</sup></b><br>(ng mL <sup>-1</sup> ) | <b>Recovery</b><br>(%) | <b>CV<sup>b</sup></b><br>(%) |
| 150                                    | 158.8                                 | 16.0                                             | 105.9                  | 10.1                         |
| 300                                    | 294.2                                 | 36.5                                             | 98.1                   | 12.4                         |
| 600                                    | 562.7                                 | 80.5                                             | 93.8                   | 14.3                         |

<sup>a</sup>: standard deviation

<sup>b</sup>: coefficient of variation

## REFERENCE

1. A. Strasser, R. Dietrich, E. Usleber and E. Märtlbauer, *Anal. Chim. Acta*, 2003, **495**, 11-19.
2. E. Märtlbauer, E. Usleber, E. Schneider and R. Dietrich, *Analyst*, 1994, **119**, 2543-2548.
3. N. R. Jana, L. Gearheart and C. J. Murphy, *Adv. Mater.*, 2001, **13**, 1389-1393.
4. P. Cliquet, B. M. Goddeeris, K. Bonroy and E. Cox, *Food Agric. Immunol.*, 2005, **16**, 101-115.
5. B. G. Knecht, A. Strasser, R. Dietrich, E. Märtlbauer, R. Niessner and M. G. Weller, *Anal. Chem.*, 2004, **76**, 646-654.
6. S. N. Jiao, P. Wang, G. X. Zhao, H. C. Zhang, J. Liu and J. P. Wang, *J. Environ. Sci. Health, Part B*, 2013, **48**, 486-494.
7. A. Strasser, E. Usleber, E. Schneider, R. Dietrich, C. Bürk and E. Märtlbauer, *Food Agric. Immunol.*, 2003, **15**, 135-143.
